# Supplementary material for: Enhanced brightness of ultra-small gold nanoparticles in the second biological window through thiol ligand shell control
Source: Royal Society of Chemistry journal article supplement (doi:10.1039/d3tc03021k), 2023-01-01
Supplement: d3tc03021k1.pdf [file d3tc03021k1.pdf]

## Enhanced brightness of ultra-small gold nanoparticles in the second biological window through thiol ligand shell control

Walaah Mohammad<sup>a†</sup>, K. David Wegner<sup>b†</sup>, Clothilde Comby-Zerbino<sup>c</sup>, Vanessa Trouillet<sup>d</sup>, Marina Paris Ogayar<sup>e</sup>, Jean-luc Coll<sup>a</sup>, Riccardo Marin,<sup>f,g</sup> Daniel Jaque Garcia<sup>e,f,g</sup>, Ute Resch-Genger<sup>b</sup>, Rodolphe Antoine<sup>c\*</sup>, Xavier Le Guével<sup>a\*</sup>

a. University of Grenoble Alpes, Institute for Advanced Biosciences, INSERM1209/CNRS-UMR5309- Grenoble-France

b. Federal Institute for Materials Research and Testing (BAM), Richard-Willstaetter-Str. 11, 12489 Berlin, Germany

c. Univ Lyon, Univ Claude Bernard Lyon 1, CNRS, Institut Lumière Matière, F-69622, VILLEURBANNE, France

d. Institute for Applied Materials (IAM) and Karlsruhe Nano Micro Facility (KNMF), Karlsruhe Institute of Technology (KIT), Eggenstein-Leopoldshafen, Germany

e. Nanomaterials for Bioimaging Group (nanoBIG), Instituto Ramón y Cajal de Investigación Sanitaria (IRYCIS) Hospital Ramón y Cajal, Ctra. De Colmenar Viejo km 9.100, Madrid 28034, Spain

f. Nanomaterials for BioImaging Group (nanoBIG), Departamento de Física de Materiales, Universidad Autónoma de Madrid, C/ Francisco Tomás y Valiente 7, 28049 Madrid, Spain

g. Institute for Advanced Research in Chemical Sciences (IAdChem), Universidad Autónoma de Madrid, 28049 Madrid, Spain

† : co-first authors

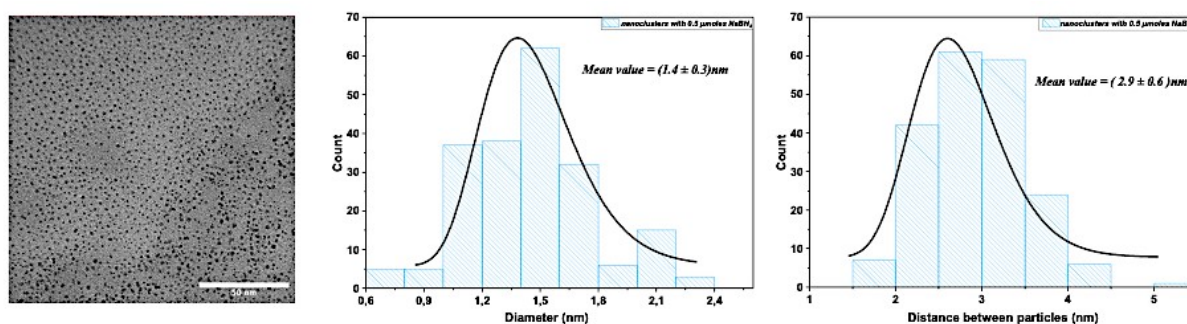

Figure S1. TEM micrograph of AuMHA/HDT prepared with 0.5  $\mu\text{mol}$  of  $\text{NaBH}_4$  and distribution of core size and distance between particles. Distributions were estimated on 200 measurements.

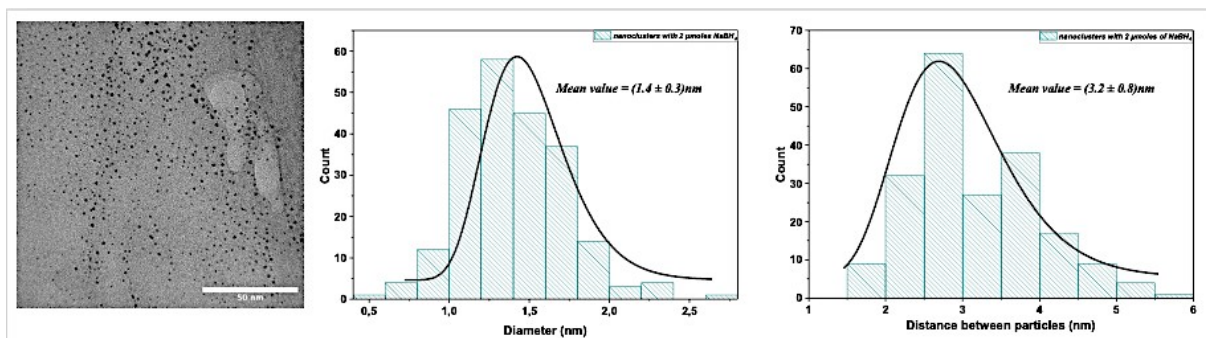

Figure S2. TEM micrograph of AuMHA/HDT prepared with 2  $\mu\text{mol}$  of  $\text{NaBH}_4$  and distribution of core size and distance between particles. Distributions were estimated on 200 measurements.

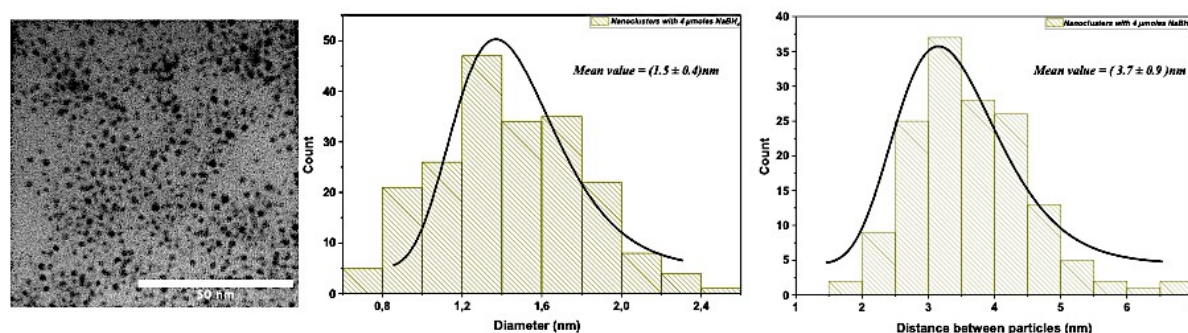

Figure S3. TEM micrograph of AuMHA/HDT prepared with 4  $\mu\text{mol}$  of  $\text{NaBH}_4$  and distribution of core size and distance between particles. Distributions were estimated on 200 measurements.

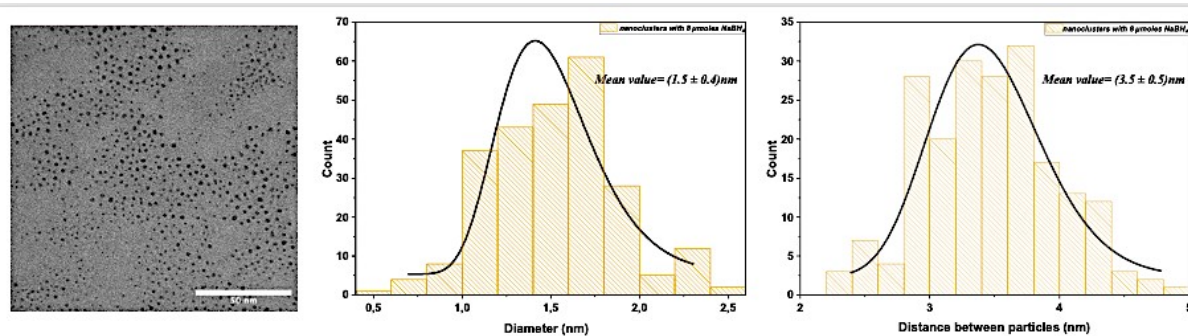

Figure S4. TEM micrograph of AuMHA/HDT prepared with 6  $\mu\text{mol}$  of  $\text{NaBH}_4$  and distribution of core size and distance between particles. Distributions were estimated on 200 measurements.

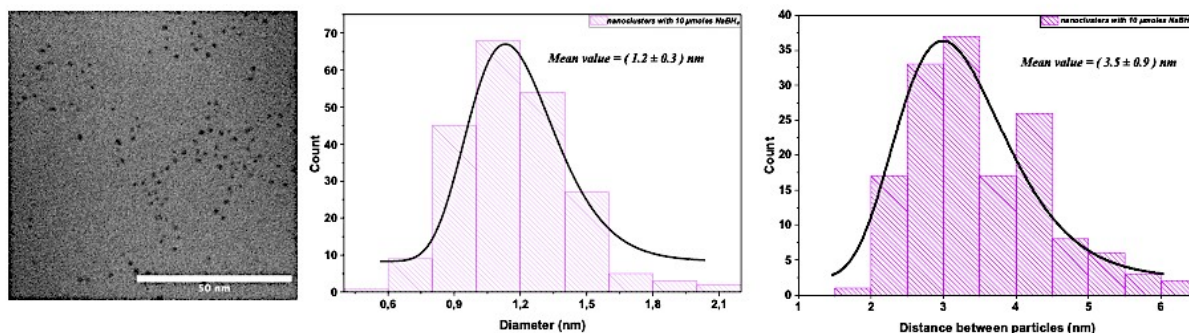

Figure S5. TEM micrograph of AuMHA/HDT prepared with 10  $\mu\text{mol}$  of  $\text{NaBH}_4$  and distribution of core size and distance between particles. Distributions were estimated on 200 measurements.

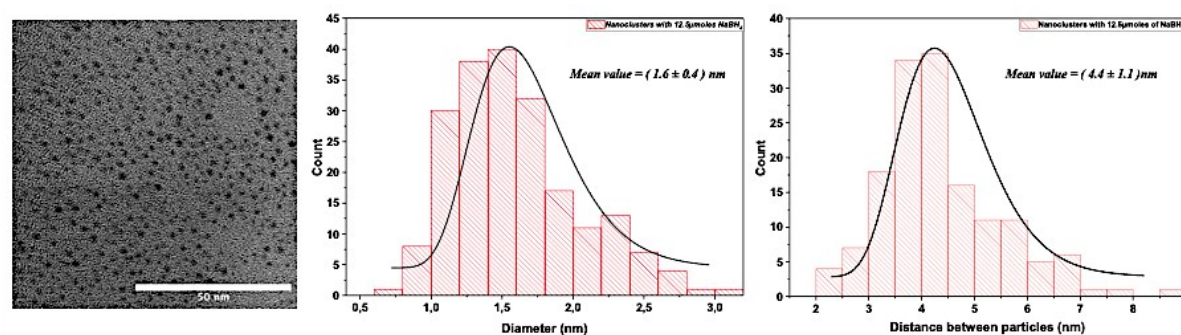

Figure S6. TEM micrograph of AuMHA/HDT prepared with 12.5  $\mu\text{mol}$  of  $\text{NaBH}_4$  and distribution of core size and distance between particles. Distributions were estimated on 200 measurements.

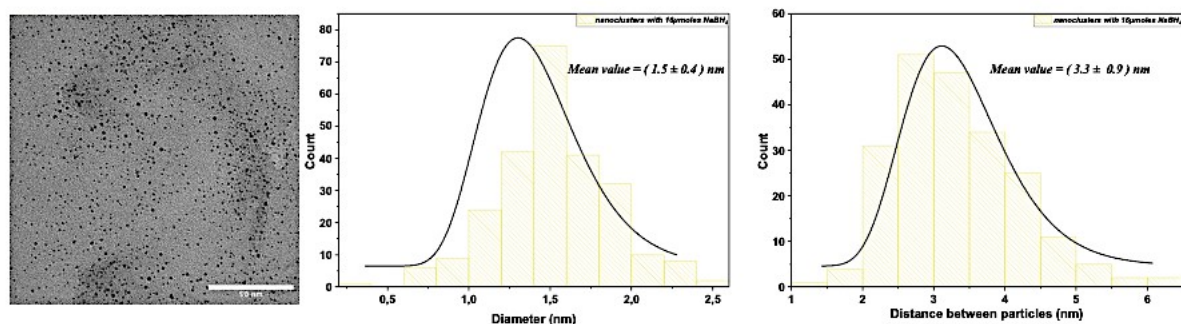

Figure S7. TEM micrograph of AuMHA/HDT prepared with 16  $\mu\text{mol}$  of  $\text{NaBH}_4$  and distribution of core size and distance between particles. Distributions were estimated on 200 measurements.

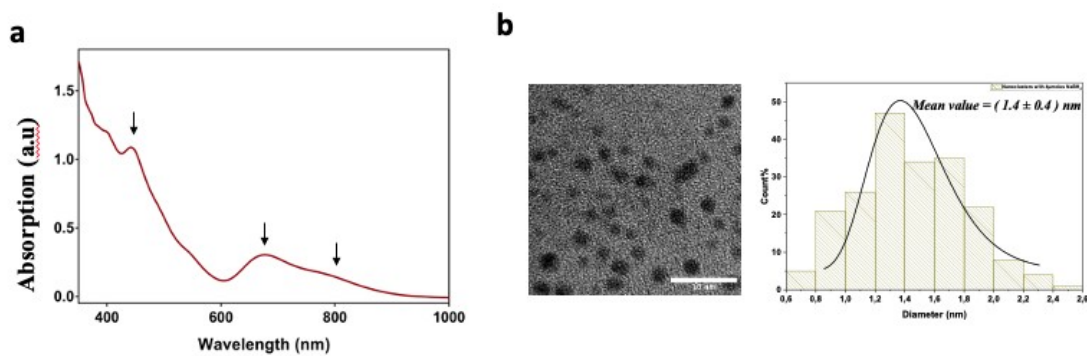

Figure S8. **a.** Absorbance spectra of AuMHA dispersed in water showing the specific bands at 420 nm, 670 nm and 780 nm. **b.** TEM micrograph of AuMHA and distribution of particle size. Distributions were estimated on 200 measurements.

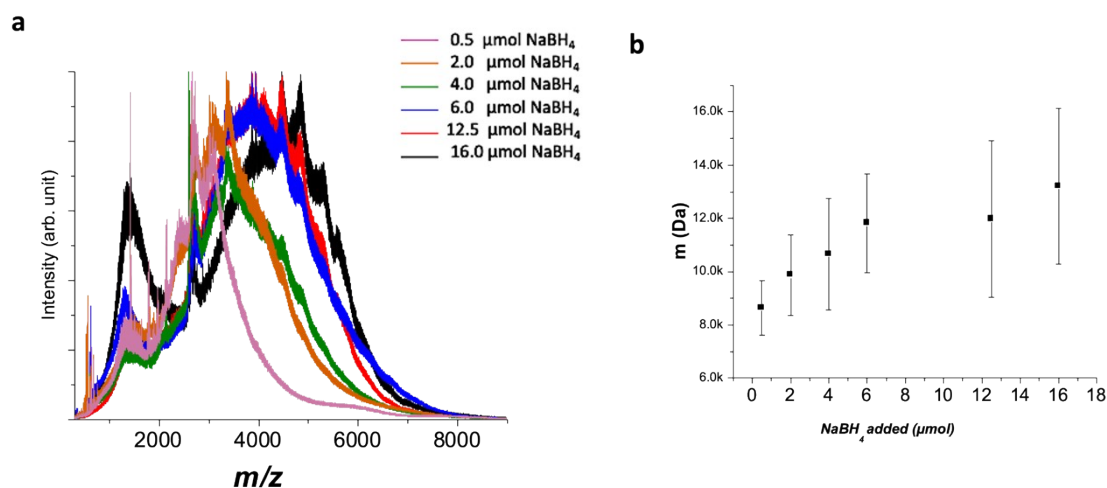

Figure S9. **a.** ESI-MS spectra of us-Au NPs samples as a function of NaBH<sub>4</sub> used during the synthesis. **b.** Estimation of average molecular weight of us-Au NPs, determined from the deconvolution of the broad envelope in the m/z spectra and assuming the same average charge state for all us-Au NPs (e.g. +3). The error bar corresponds the standard deviation.



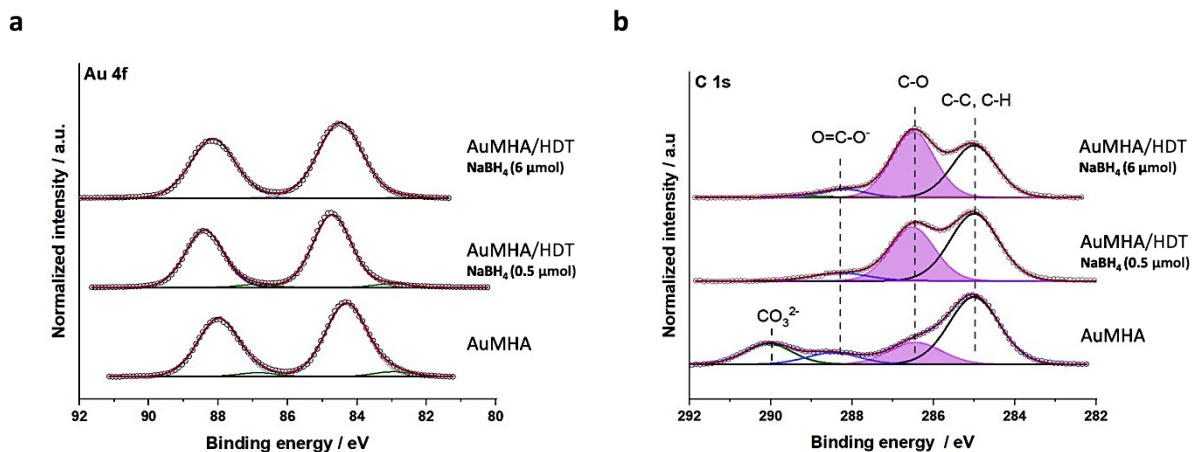

Figure S10. **a.** XPS spectra for gold Au4f. **b.** XPS spectra of C1s of AuMHA, AuMHA/HDT samples .

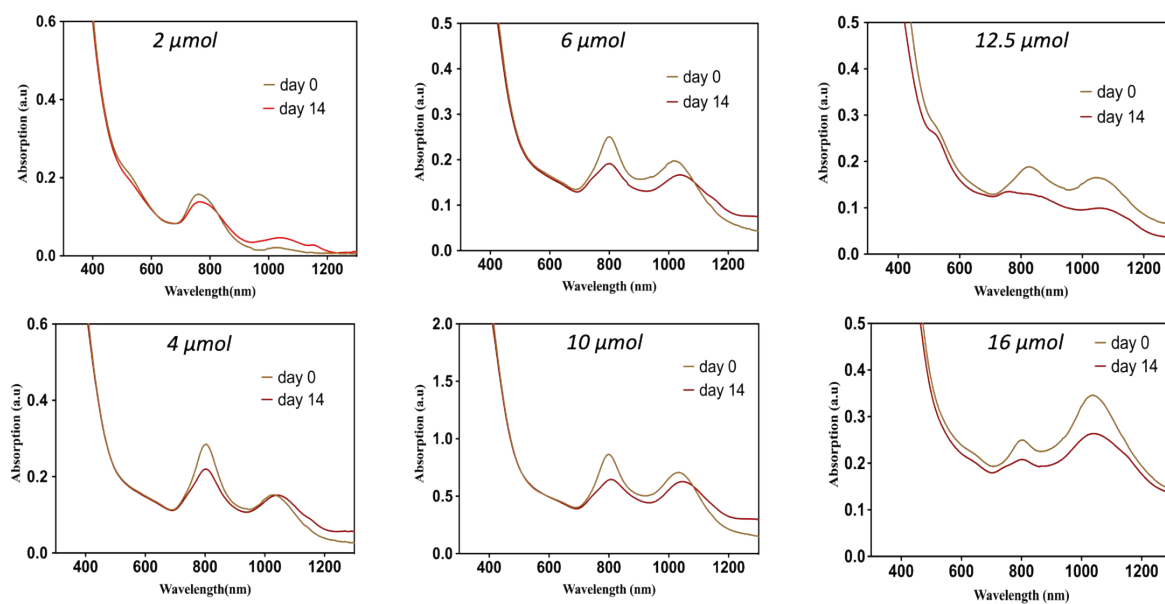

Figure S11. Absorbance spectra of AuMHA/HDT samples in PBS (pH 7.4) prepared with different amount of  $\text{NaBH}_4$  at day 0 and day 14.

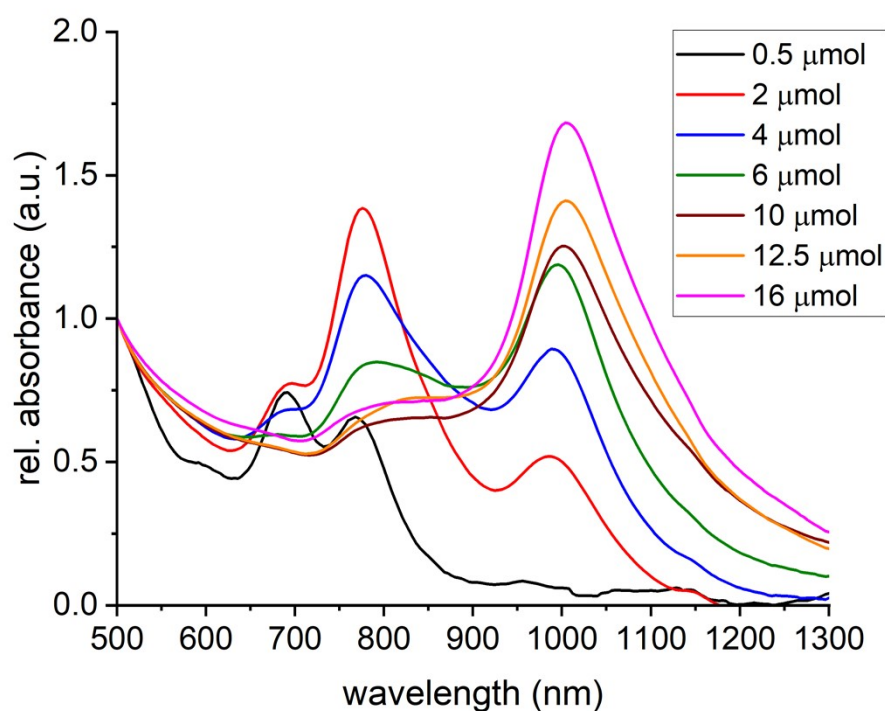

Figure S12. Absorbance spectra of AuMHA/HDT samples prepared with different amount of  $\text{NaBH}_4$  and normalized at  $\lambda_{\text{exc}}$ . 500 nm.

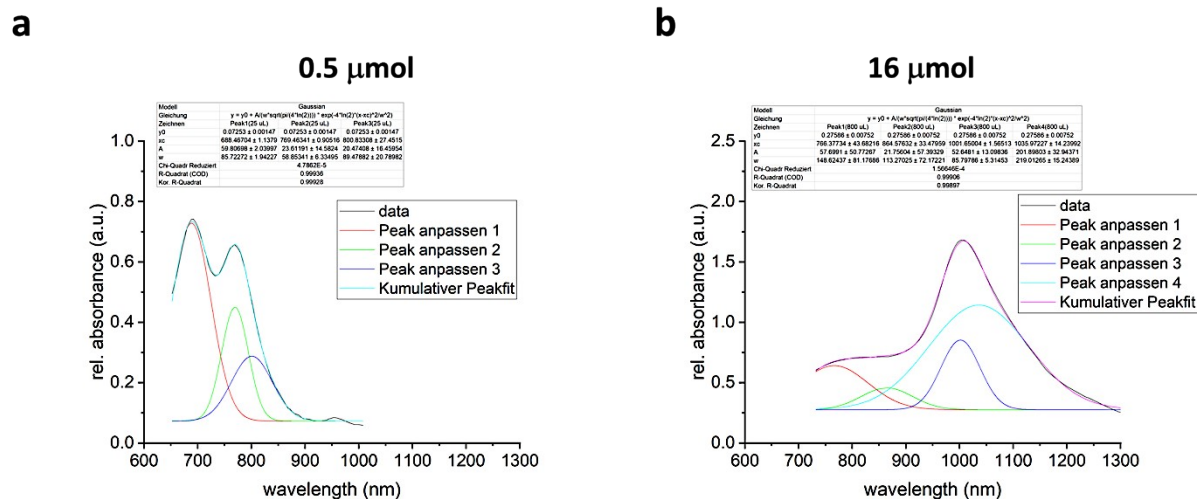

Figure S13. Deconvolution of the absorbance spectra normalized at  $\lambda_{\text{exc}}$ . 500 nm of AuMHA/HDT samples prepared with 0.5  $\mu\text{mol}$  (a) and 16  $\mu\text{mol}$  (b) of  $\text{NaBH}_4$ .

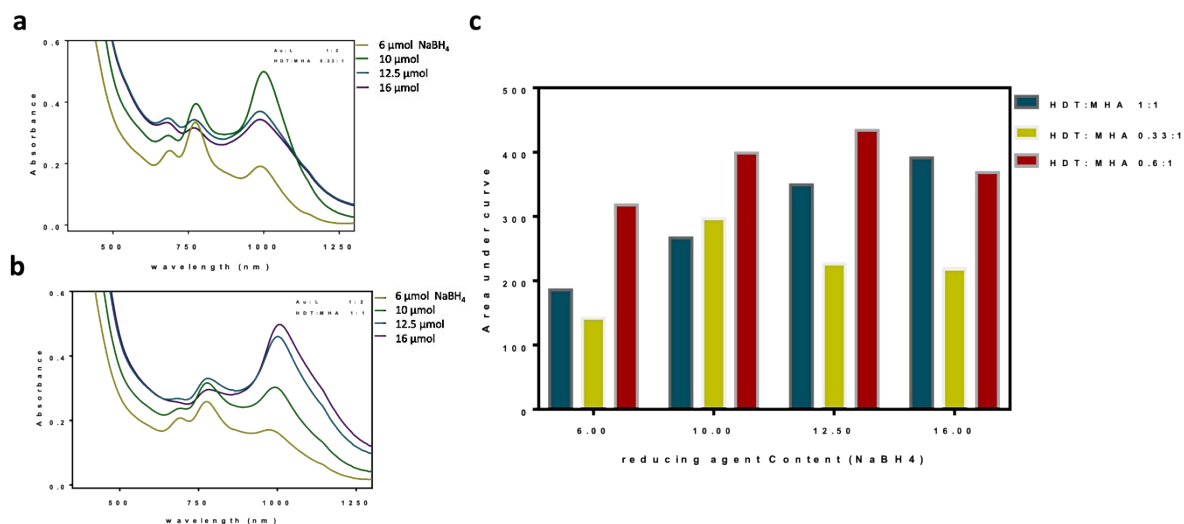

Figure S14. Absorbance spectra of AuMHA/HDT prepared at the ratio MHA:HDT = 0.33:1 (a) and 1:1 (b) as a function of NaBH<sub>4</sub> amount. (c) Area under the absorbance band at 990 nm at the different ratio AuMHA/HDT and controlling the amount of NaBH<sub>4</sub>.

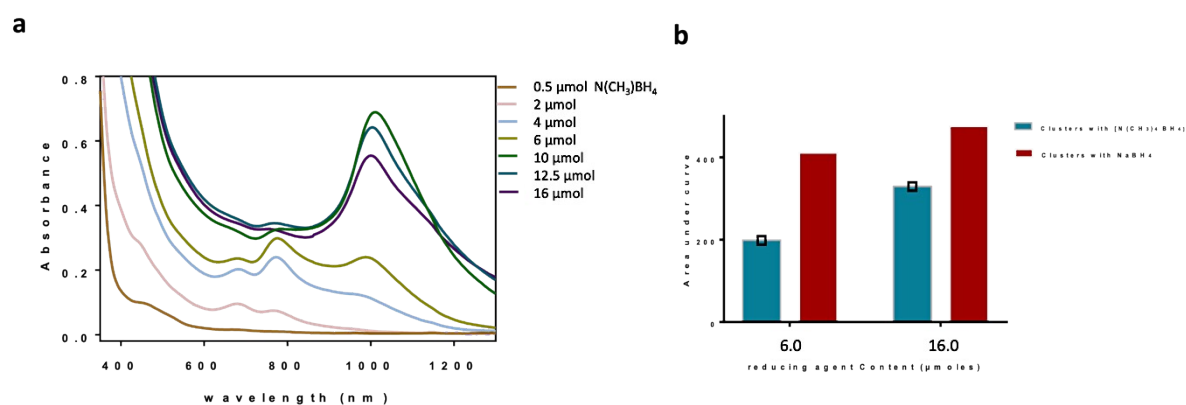

Figure S15. **a.** Absorbance spectra of AuMHA/HDT prepared with different amount of TMABH<sub>4</sub>. **b.** Area under the absorbance band at 990 nm for AuMHA/HDT prepared using 6 or 16 μmol of NaBH<sub>4</sub> or TMABH<sub>4</sub>.

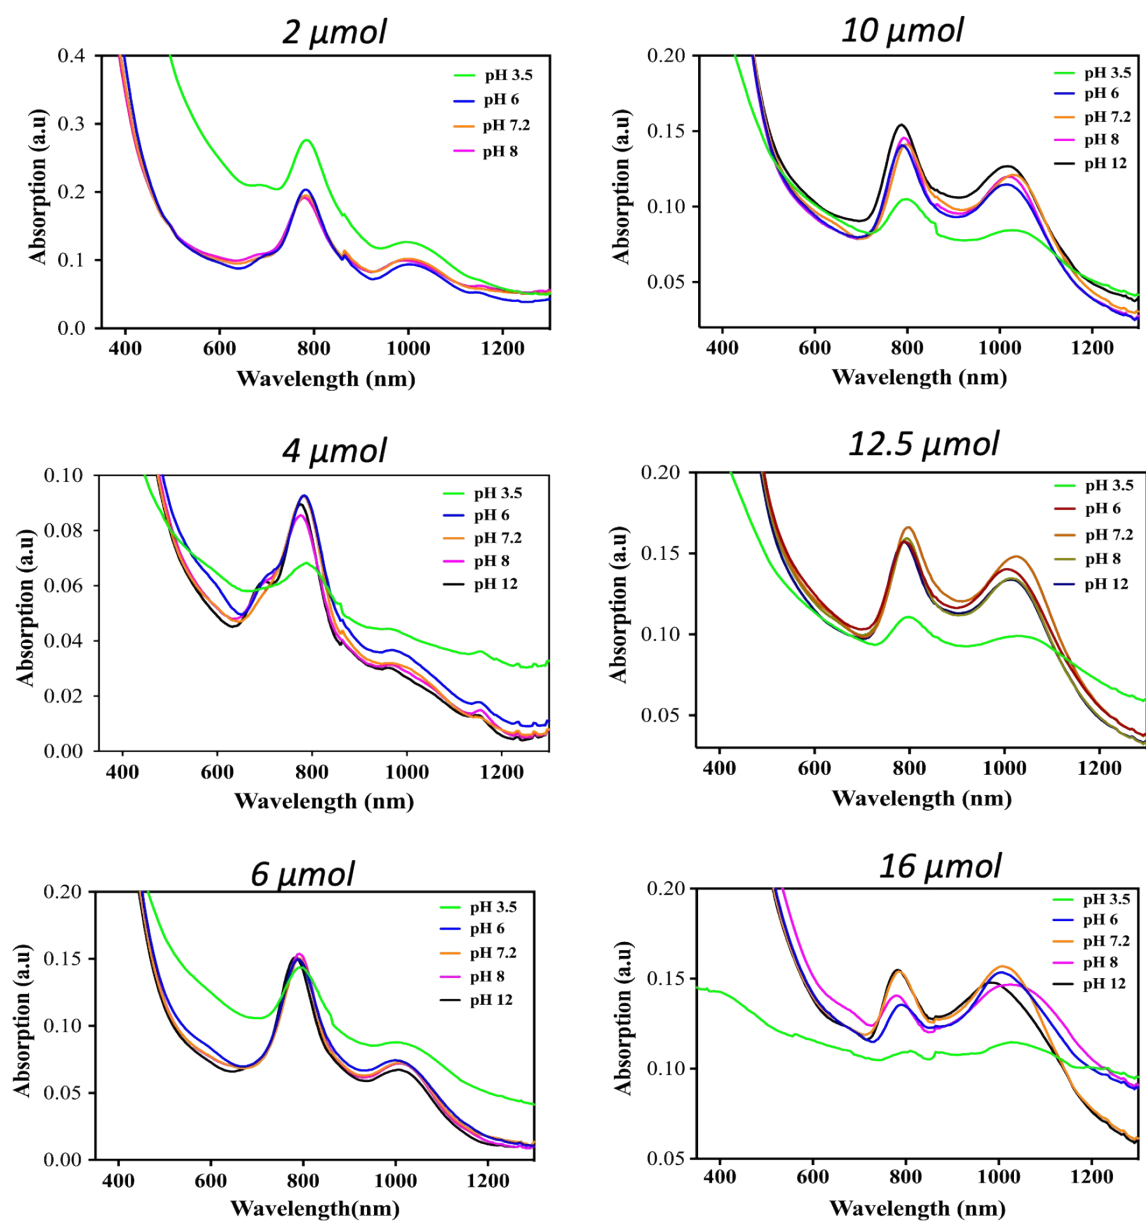

Figure S16. Absorbance spectra of AuMHA/HDT samples prepared with different amount of  $\text{NaBH}_4$  and diluted in solutions at different pH.



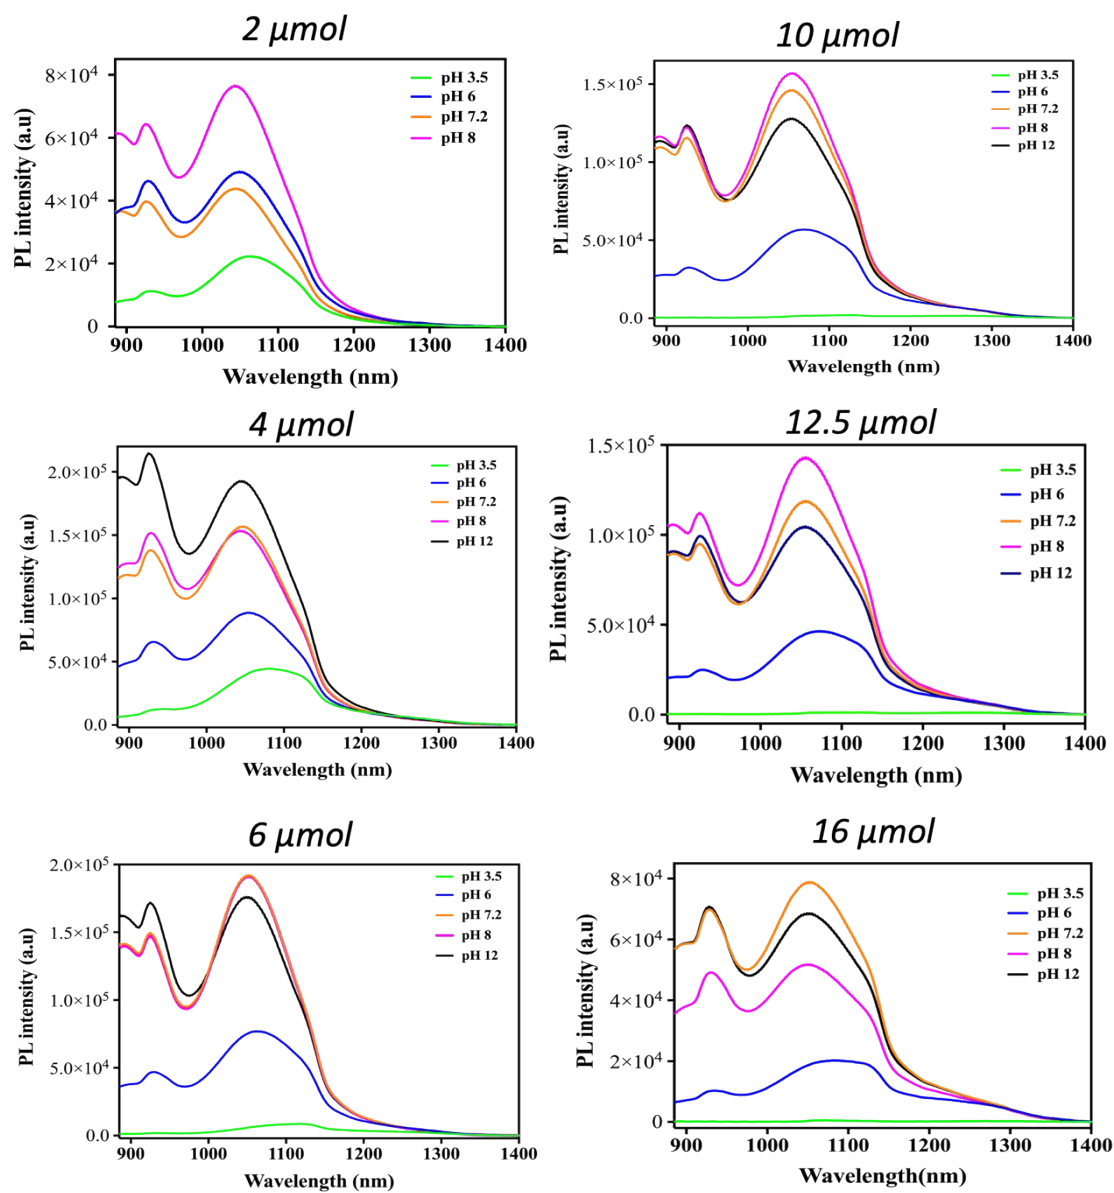

Figure S17. PL spectra ( $\lambda_{\text{exc.}}$  808 nm) of AuMHA/HDT samples prepared with different amount of  $\text{NaBH}_4$  and diluted in solutions at different pH.

**a**

| 450.8 nm Excitation                  | $\tau_1$ (ns)       | $A_1$ (%) | $\tau_2$ (ns)  | $A_2$ (%) | $\tau_3$ (ns) | $A_3$ (%) | $R^2$   |
|--------------------------------------|---------------------|-----------|----------------|-----------|---------------|-----------|---------|
| S1 (2 $\mu$ mol NaBH <sub>4</sub> )  | 1.057 $\pm$ 0.003   | 2.0       | 86.3 $\pm$ 0.5 | 16.9      | 729 $\pm$ 3   | 81.1      | 0.99674 |
| S2 (6 $\mu$ mol NaBH <sub>4</sub> )  | 1.0198 $\pm$ 0.0008 | 8.8       | 77.0 $\pm$ 0.5 | 23.9      | 523 $\pm$ 3   | 67.4      | 0.99957 |
| S3 (16 $\mu$ mol NaBH <sub>4</sub> ) | 0.8489 $\pm$ 0.0006 | 12.3      | 41.1 $\pm$ 0.2 | 30.6      | 250 $\pm$ 2   | 57.0      | 0.99975 |

**b**

| 634.3 nm Excitation                  | $\tau_1$ (ns)     | $A_1$ (%) | $\tau_2$ (ns)   | $A_2$ (%) | $\tau_3$ (ns) | $A_3$ (%) | $R^2$   |
|--------------------------------------|-------------------|-----------|-----------------|-----------|---------------|-----------|---------|
| S1 (2 $\mu$ mol NaBH <sub>4</sub> )  | 0.782 $\pm$ 0.005 | 1.2       | 115.7 $\pm$ 1.7 | 17.8      | 680 $\pm$ 7   | 81.0      | 0.99279 |
| S2 (6 $\mu$ mol NaBH <sub>4</sub> )  | 0.784 $\pm$ 0.002 | 3.7       | 66.2 $\pm$ 0.5  | 22.6      | 459 $\pm$ 3   | 73.7      | 0.99864 |
| S3 (16 $\mu$ mol NaBH <sub>4</sub> ) | 0.750 $\pm$ 0.002 | 5.8       | 38.4 $\pm$ 0.3  | 30.3      | 230 $\pm$ 2   | 63.8      | 0.99875 |

Figure S18. a. PL lifetime components for AuMHA/HDT samples dispersed in PBS (pH 7.4) using 450.8 nm excitation (a) and 634.3 nm excitation (b). Lifetimes measured at 20 °C.
